# Supplementary material
Source: MDPI journal article supplement (https://www.mdpi.com/2073-4395/11/12/2562)
Supplement: s1 [file s1]

Archive with 5 entries (5 files):
- Supplementary Figure S1.pdf
- Supplementary Figure S2.pdf
- Supplementary Material and Methods S1.pdf
- Supplementary Table S1.xlsx
- Supplementary Table S2.xlsx
