# Supplementary material
Source: MDPI journal article supplement (https://www.mdpi.com/2073-4395/11/12/2562)
Supplement: s1 [file s1 › Supplementary Table S1.xlsx]

## Sheet: Foglio1
Kingdom	Phylum	Class	Order	OMWW1	OMWW2	OMWW3	OMWW4			%
Bacteria	Cyanobacteria	Chloroplast	Streptophyta	0.911923	0.922202	0.908503	0.890775		3.6334	91.4902
Bacteria	Proteobacteria	Gammaproteobacteria	Enterobacteriales	0.0118784	0.0087341	0.0173815	0.0106437		0.0486376	1.22471
Bacteria	Proteobacteria	Alphaproteobacteria	Rickettsiales	0.0722559	0.0566099	0.0681716	0.0751816		0.272219	6.85455
Bacteria	Proteobacteria	Alphaproteobacteria	Rhizobiales	0.00285869	0.0057149	0.00383747	0.00468829		0.0170994	0.430567
				0.998916	0.993261	0.997893	0.981289		3.97136	100
Kingdom	Phylum
Bacteria	Cyanobacteria			0.911923	0.922202	0.908503	0.890775		3.6334	91.2381
Bacteria	Proteobacteria			0.0880773	0.0744016	0.0911211	0.0953286		0.348929	8.76192
				1	0.996603	0.999624	0.986104		3.98233	100
Kingdom	Phylum	Class
k__Bacteria	p__Cyanobacteria	c__Chloroplast		0.911923	0.922202	0.908503	0.890775		3.6334	91.2381
k__Bacteria	p__Proteobacteria	c__Gammaproteobacteria		0.0122234	0.0087341	0.0176825	0.0124176		0.0510576	1.2821
k__Bacteria	p__Proteobacteria	c__Alphaproteobacteria		0.0751146	0.0629178	0.072009	0.0807146		3.68446	92.5202
