# Supplementary material
Source: MDPI journal article supplement (https://www.mdpi.com/2073-4395/11/12/2562)
Supplement: s1 [file s1 › Supplementary Table S2.xlsx]

## Sheet: Richness
Richness
	Observed	Shannon	Simpson			Media tesi
Unamended_40c	766	5.29745	0.976164			Observed	Shannon	Simpson
2 year_40c	1294	6.25904	0.994875		Unamended	830.5	5.66546	0.985131
14 days_40c	1039	5.73747	0.990898		14-Days	936.667	5.26693	0.980855
1 year_40b	883	5.69131	0.98871		1-Year	917.167	5.69574	0.988278
1 year_40a	758	5.43771	0.988405		2-Year	1013.67	5.96118	0.989876
14 days_40b	1037	5.97394	0.993457
2 year_40b	1150	6.434	0.996934
2 year_20a	1096	6.05977	0.993985
1 year_20a	1132	6.05029	0.992254
Unamended_40b	1018	5.95603	0.990419
2 year_20b	1119	5.9011	0.985438
2 year_20c	1072	5.92886	0.978436
Unamended_20c	860	6.06762	0.9955
Unamended_20a	564	4.89599	0.965365
Unamended_40a	806	5.77115	0.989041
Unamended_20b	969	6.0045	0.994294
1 year_20b	772	5.15143	0.974477
14 days_20b	931	4.90032	0.975379
14 days_40a	1016	5.36119	0.982741
1 year_40c	1221	6.08429	0.992023
14 days_20a	785	4.72727	0.967356
1 year_20c	737	5.75943	0.993799
14 days_20c	812	4.90138	0.9753
2 year_40a	351	5.18429	0.98959
