# Supplementary material
Source: MDPI journal article supplement (https://www.mdpi.com/2073-4395/11/12/2562)

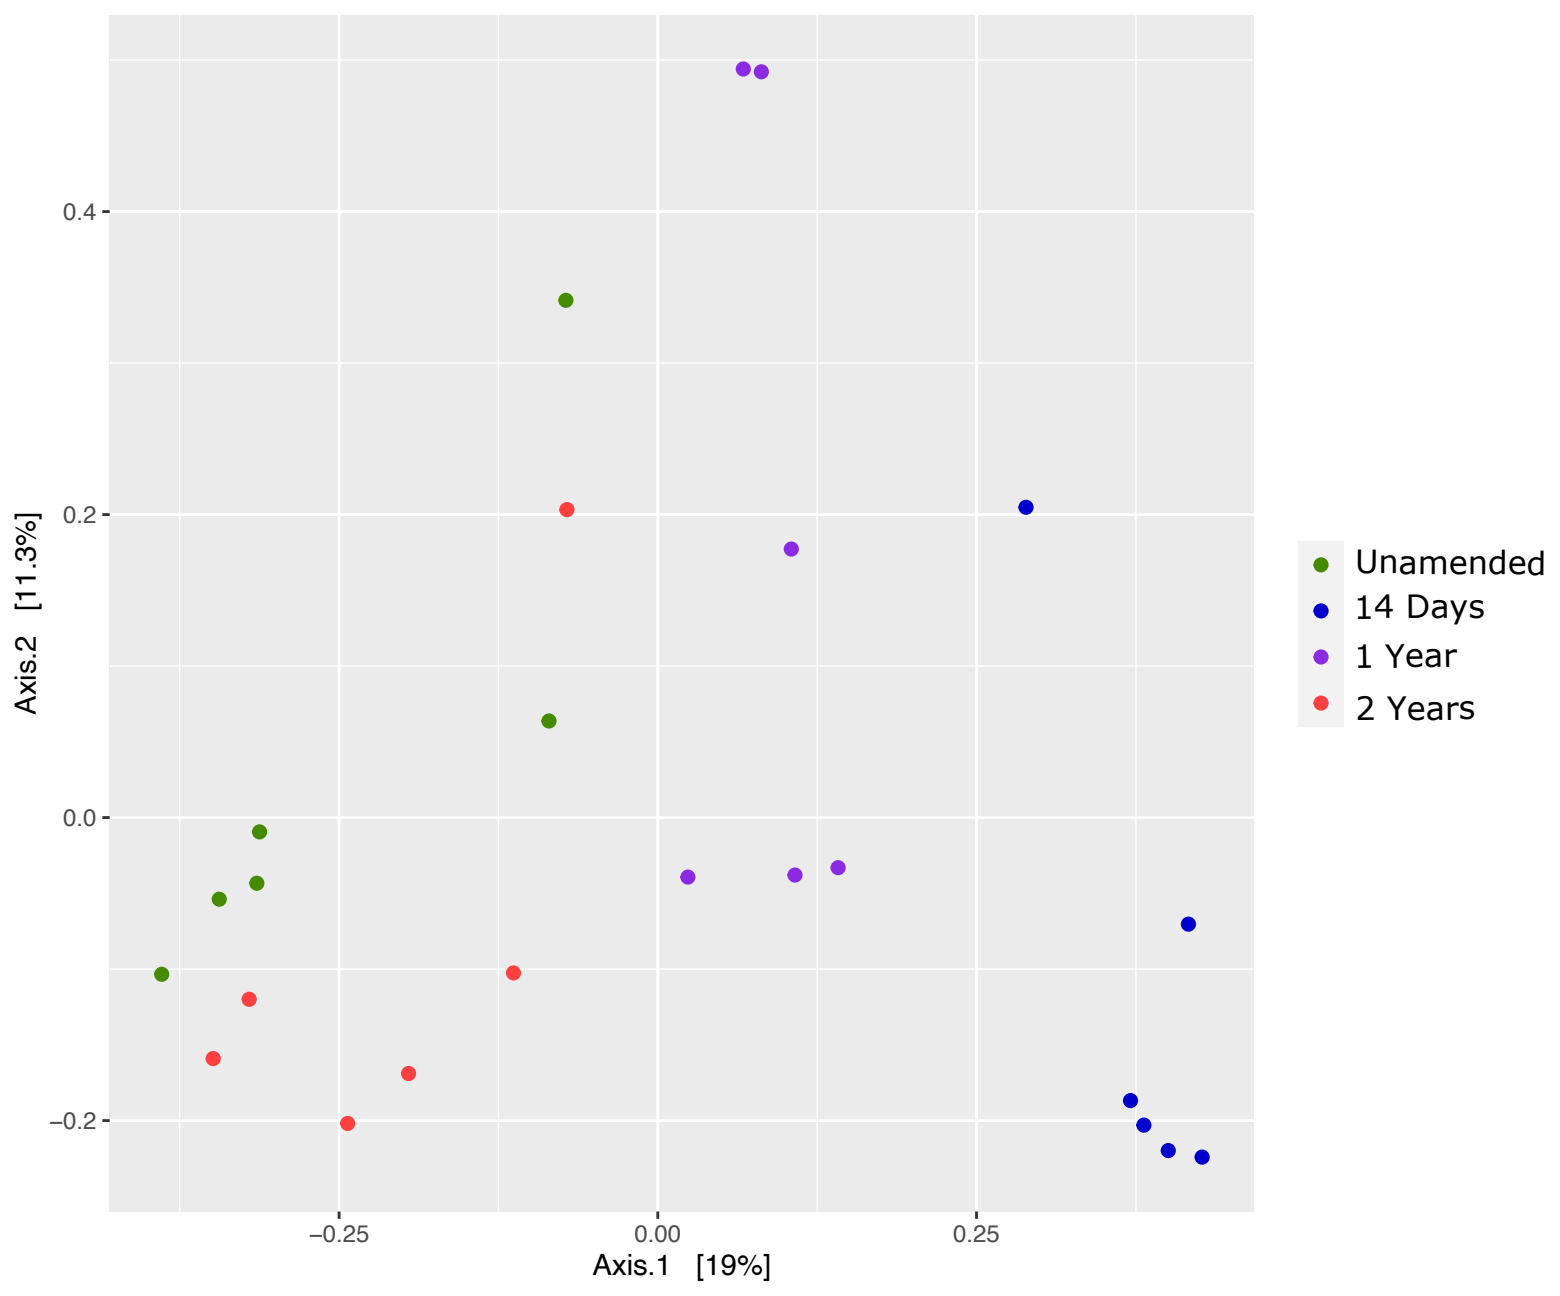

Supplement: s1 [file s1 › Supplementary Figure S1.pdf]

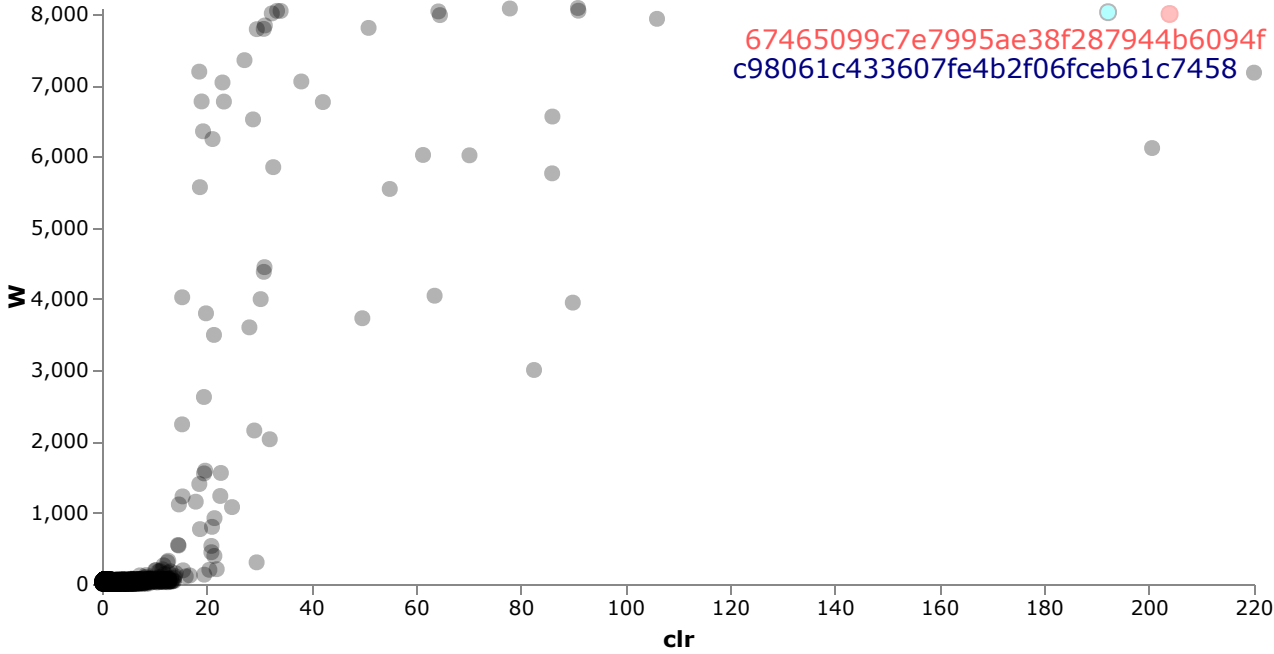

Supplement: s1 [file s1 › Supplementary Figure S2.pdf]
